# Supplementary figures and images for: Path planning of mechanical polishing process for freeform surface with a small polishing tool
Source: Springer Nature journal article supplement (doi:10.1186/s40638-014-0024-1), 2014-12-01

**Removal difference ratio (I)**

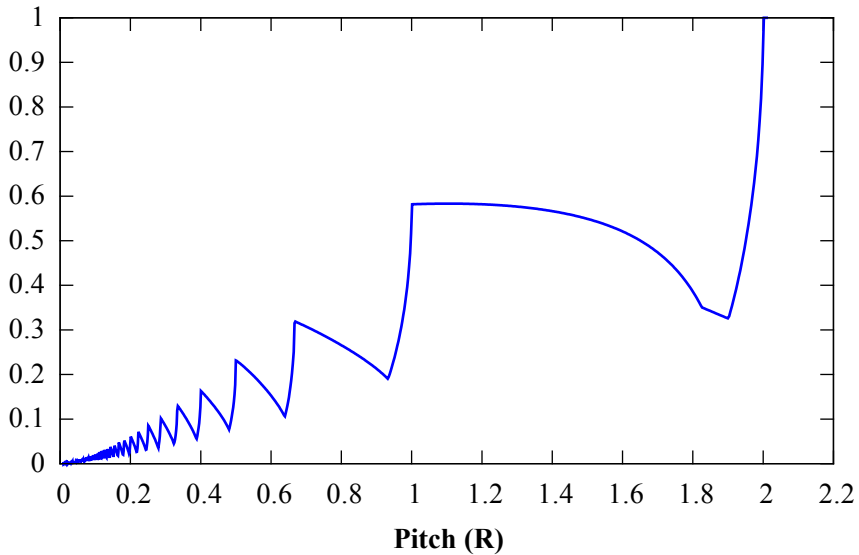

Supplement: MOESM22 [file 11901960]

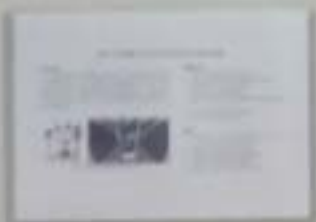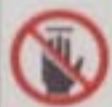

警告

非专业人员勿动  
Don't touch or  
maintain except  
specialized persons

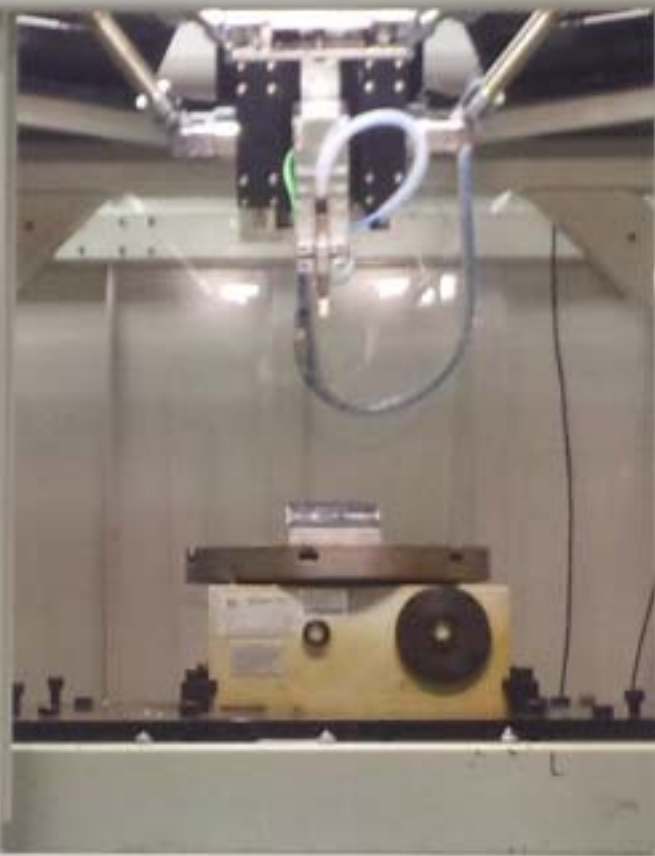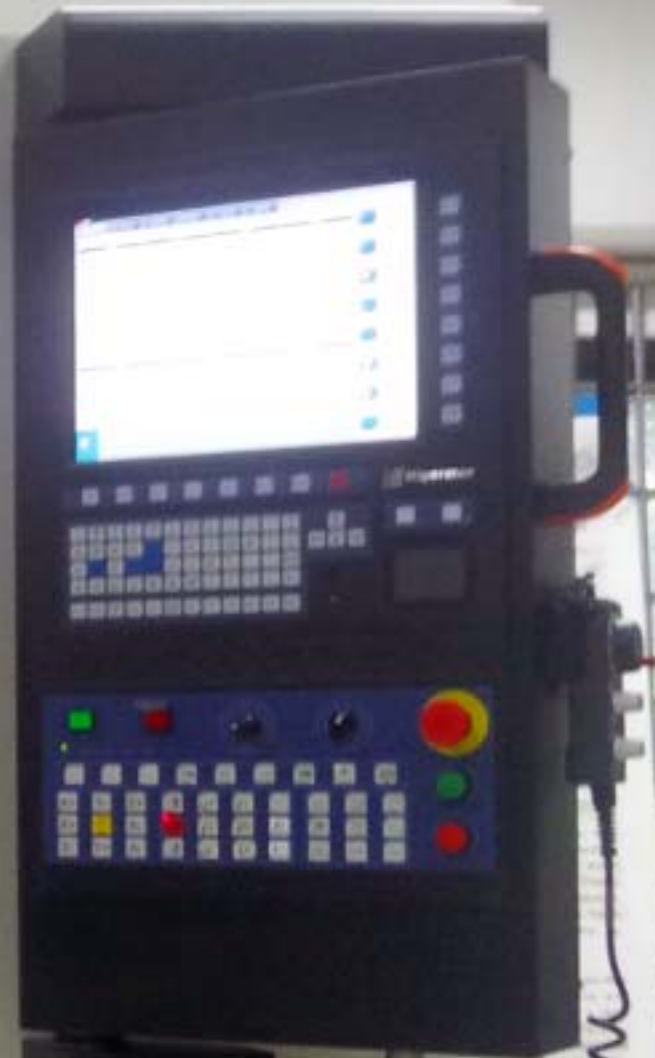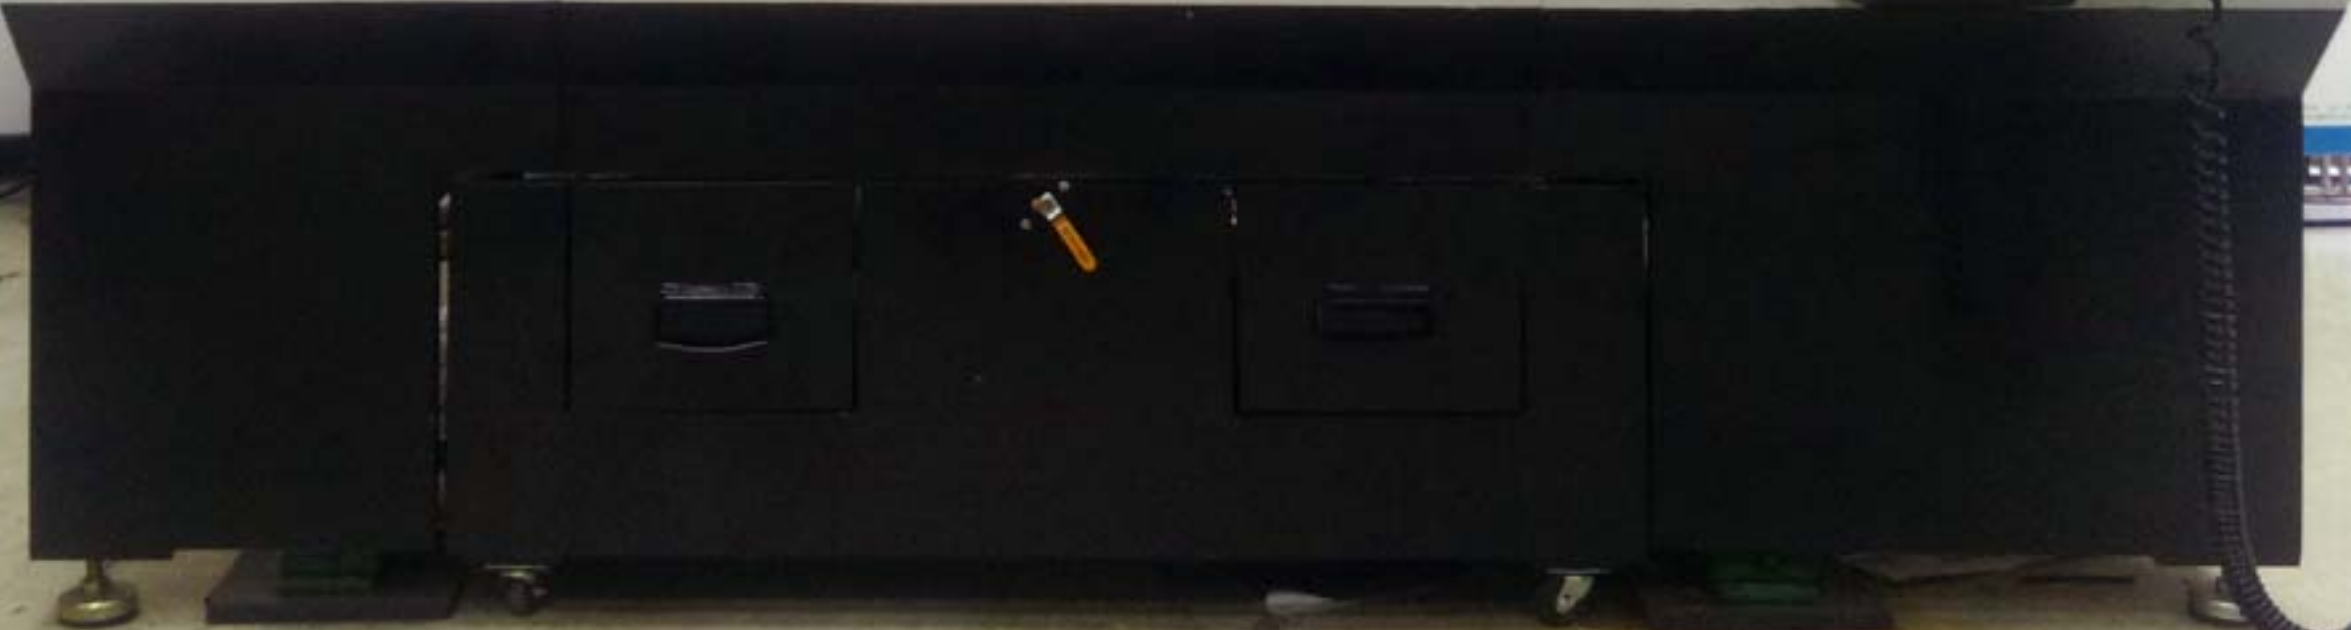

Supplement: MOESM23 [file 11901960]

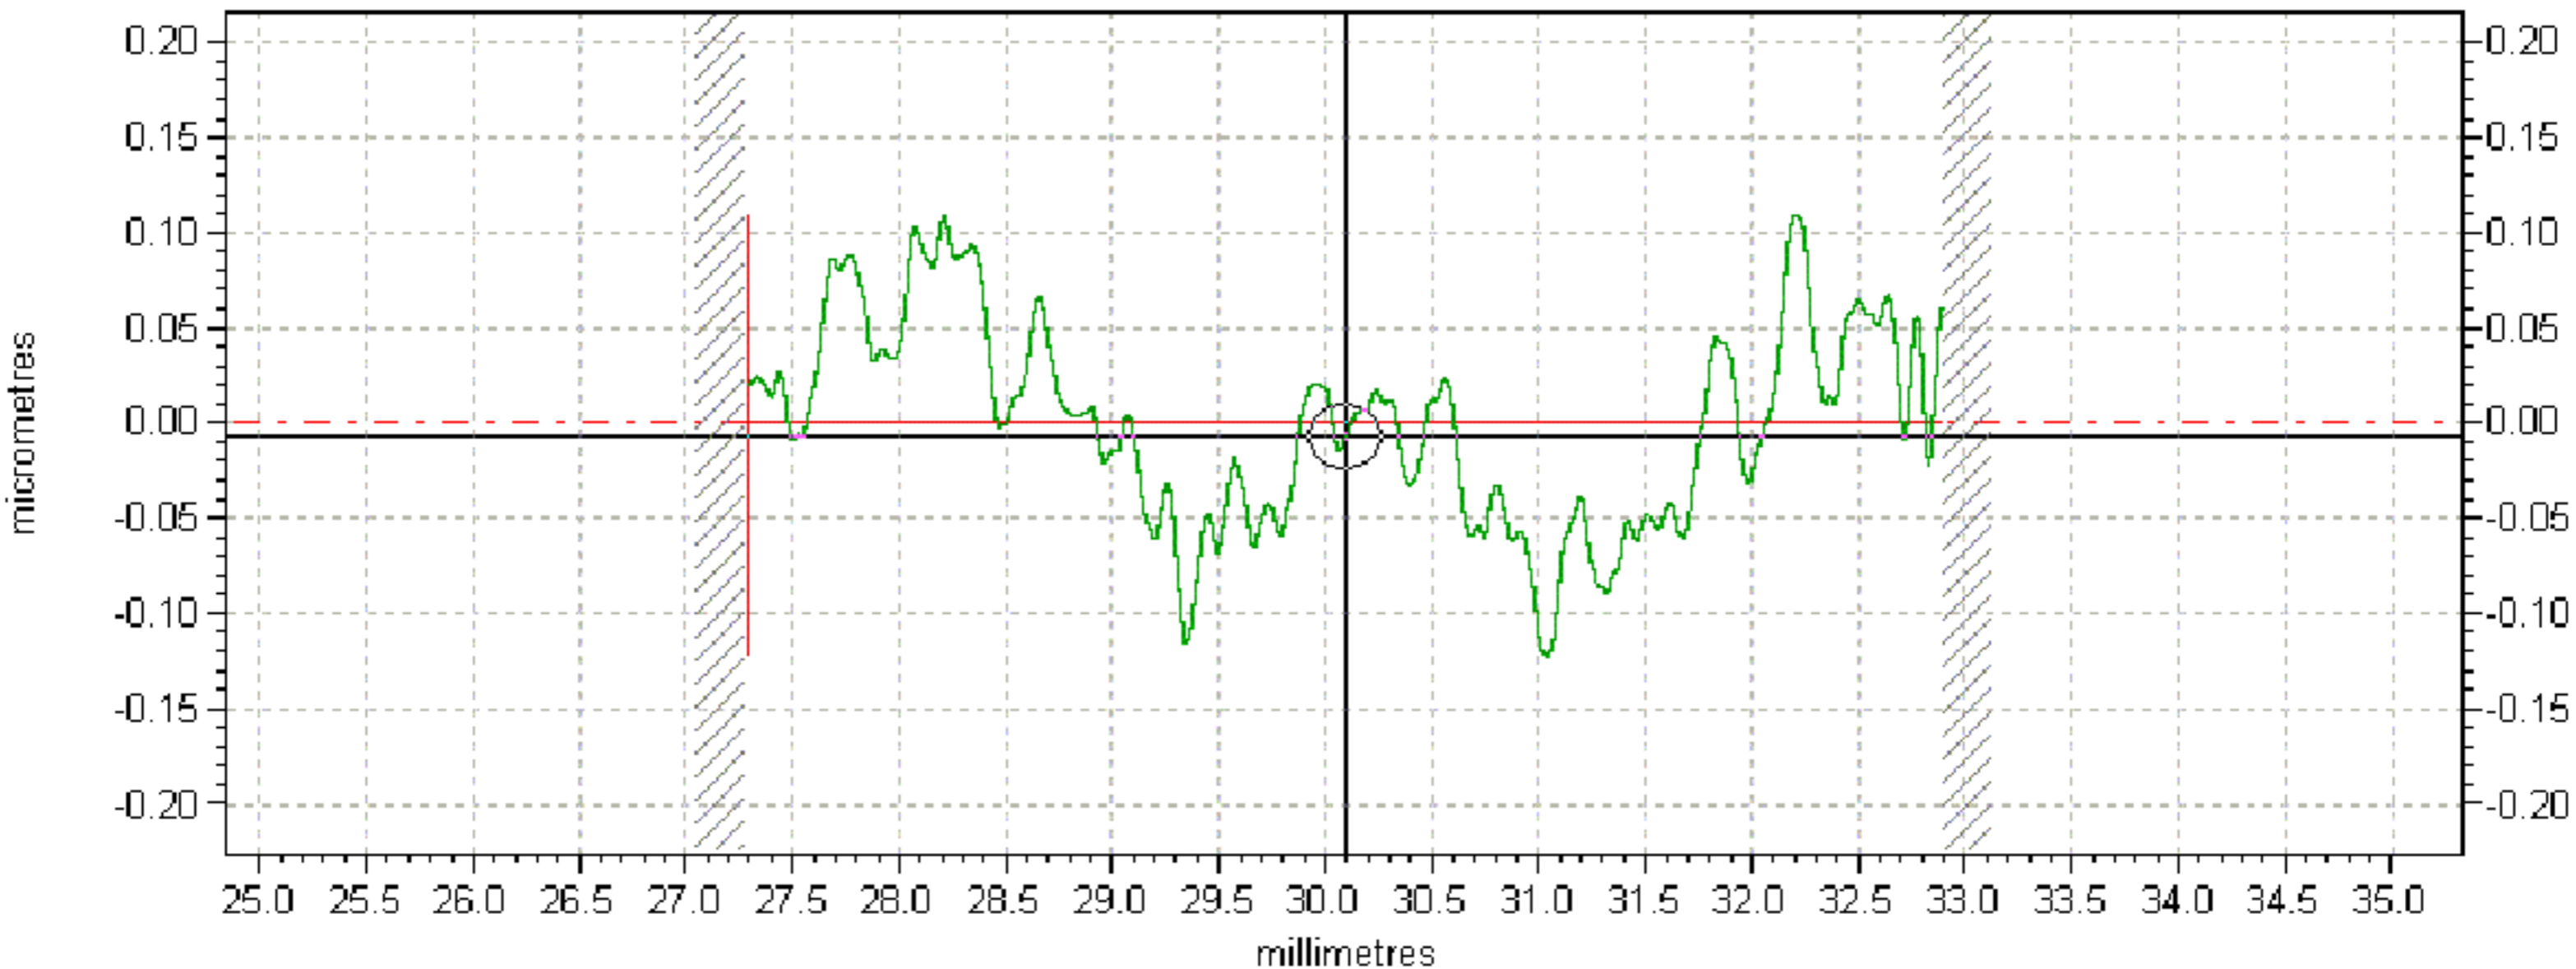

Supplement: MOESM24 [file 11901960]

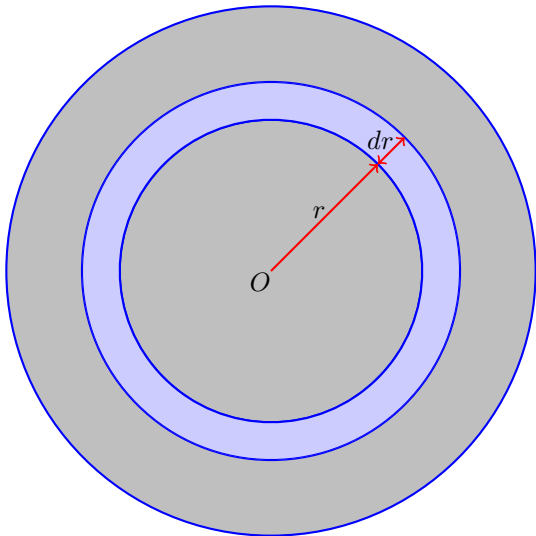

Supplement: MOESM25 [file 11901960]

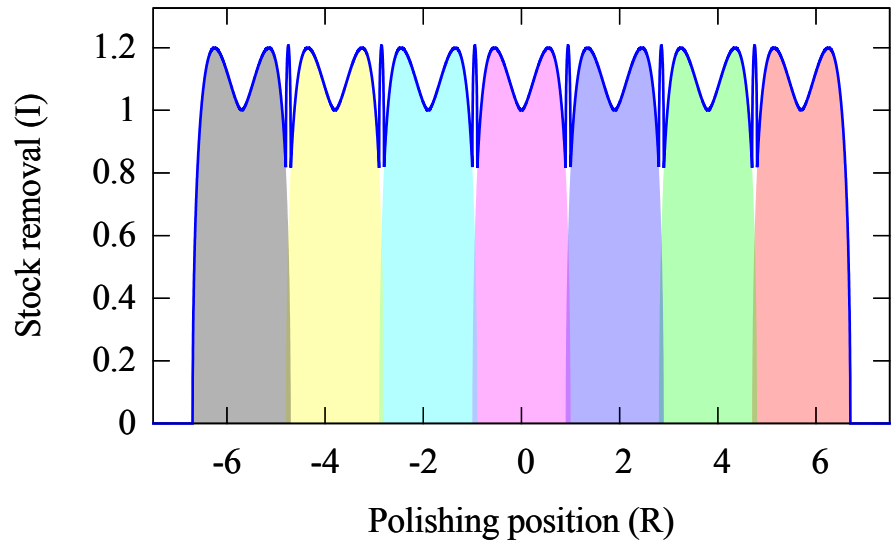

Supplement: MOESM26 [file 11901960]

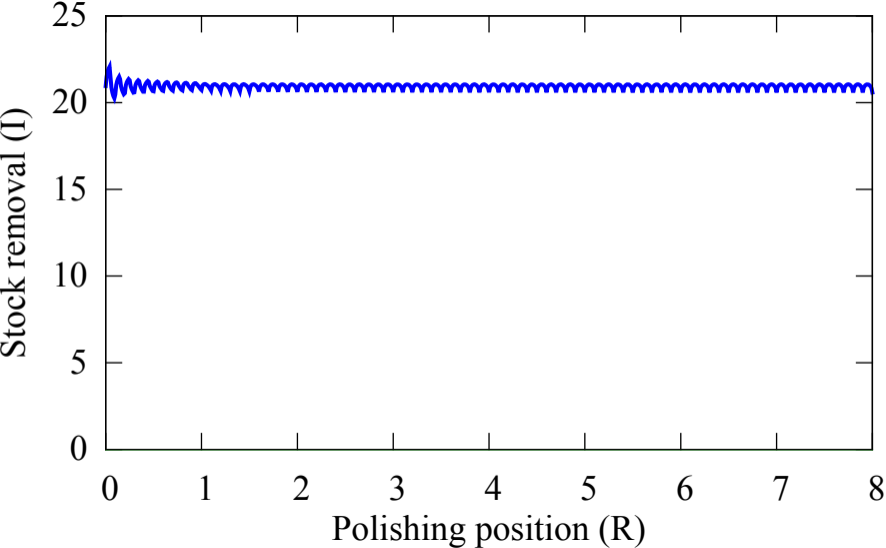

Supplement: MOESM27 [file 11901960]

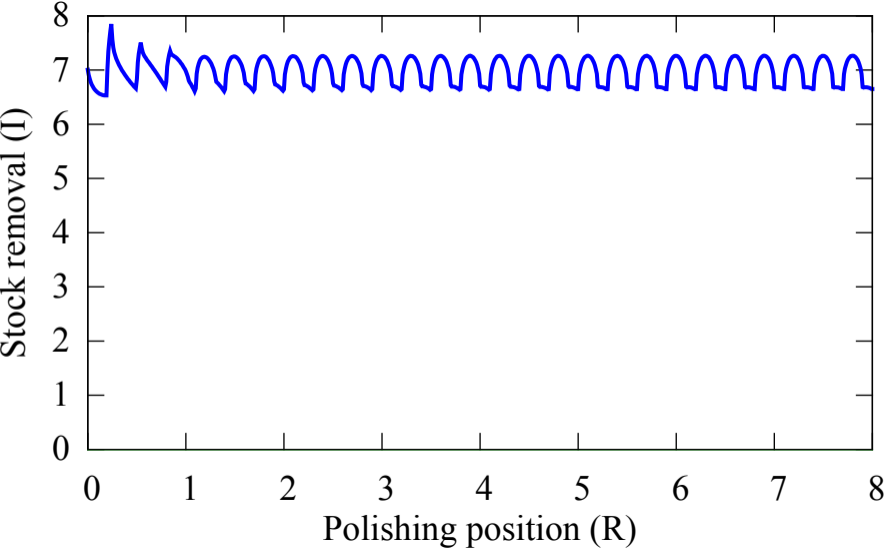

Supplement: MOESM28 [file 11901960]

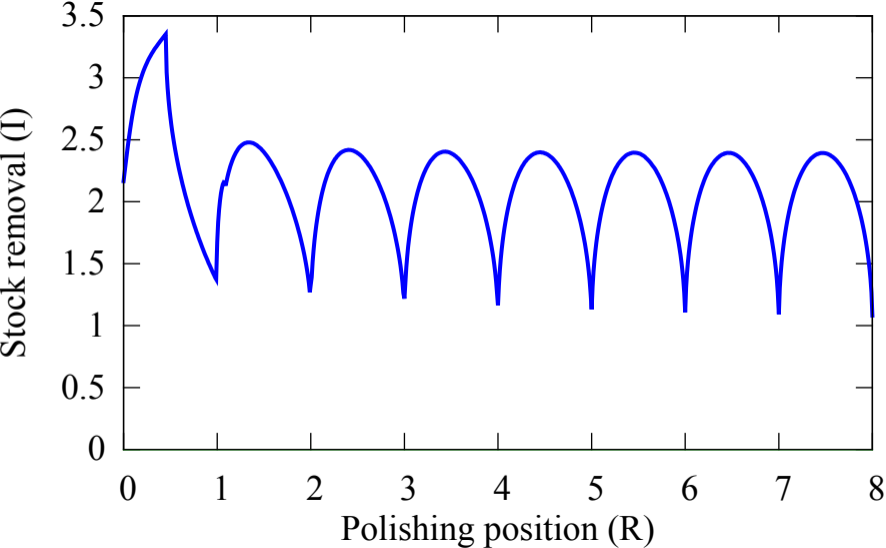

Supplement: MOESM29 [file 11901960]

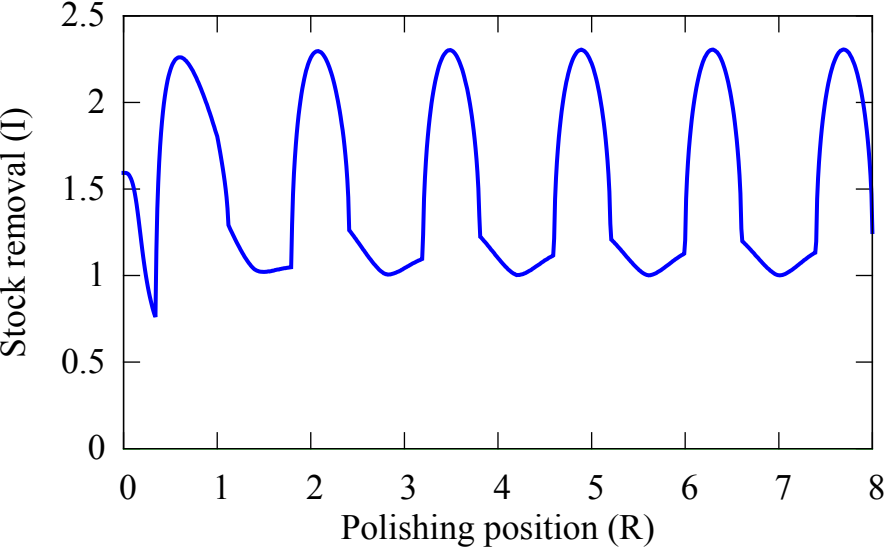

Supplement: MOESM30 [file 11901960]

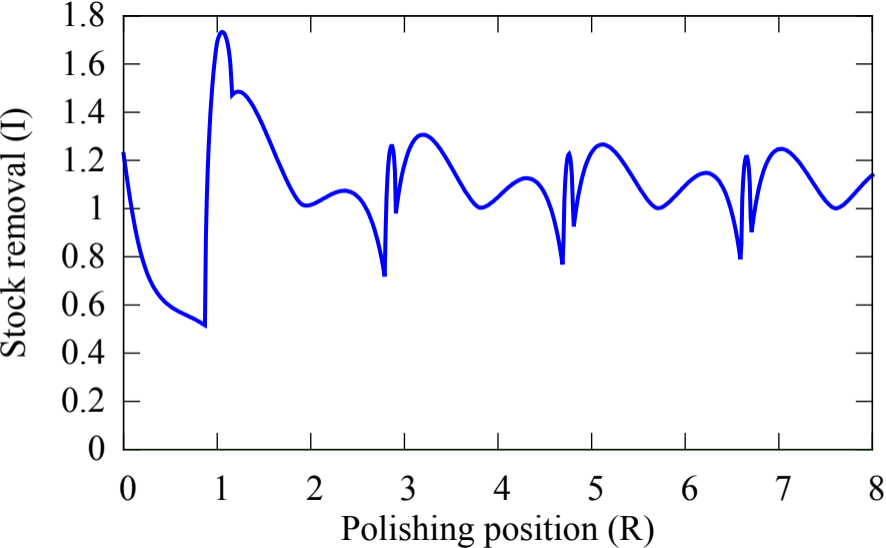

Supplement: MOESM31 [file 11901960]

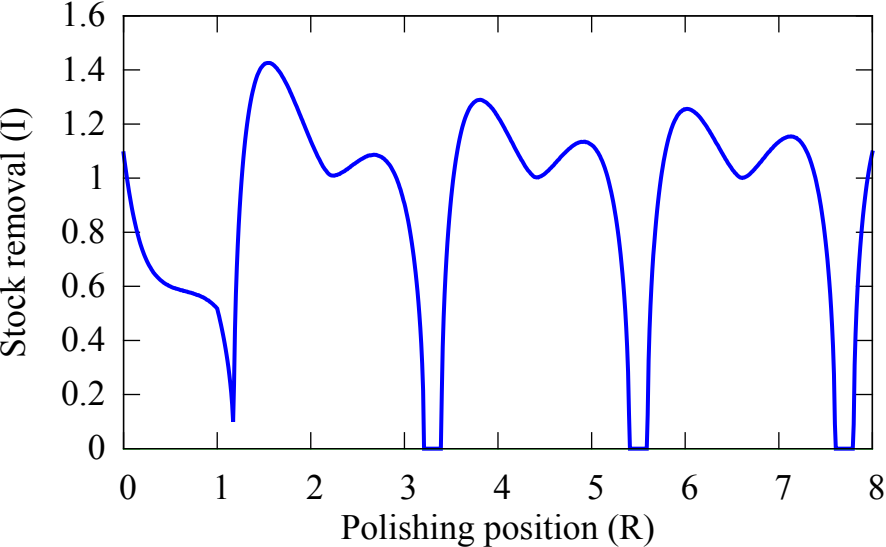

Supplement: MOESM32 [file 11901960]
